# Supplementary material
Source: publisher figshare collection journal article supplement (https://acs.figshare.com/ndownloader/files/10953782)
Supplement: Supplementary file 1 [file 10953782]

## Supporting Information

# Evolution of Exsolved Nanoparticles on a Perovskite Oxide Surface during a Redox Process

*Ke-Yu Lai and Arumugam Manthiram\**

Materials Science and Engineering Program & Texas Materials Institute, The University  
of Texas at Austin, Austin, TX, USA

\*Corresponding Author: [rmanth@mail.utexas.edu](mailto:rmanth@mail.utexas.edu)

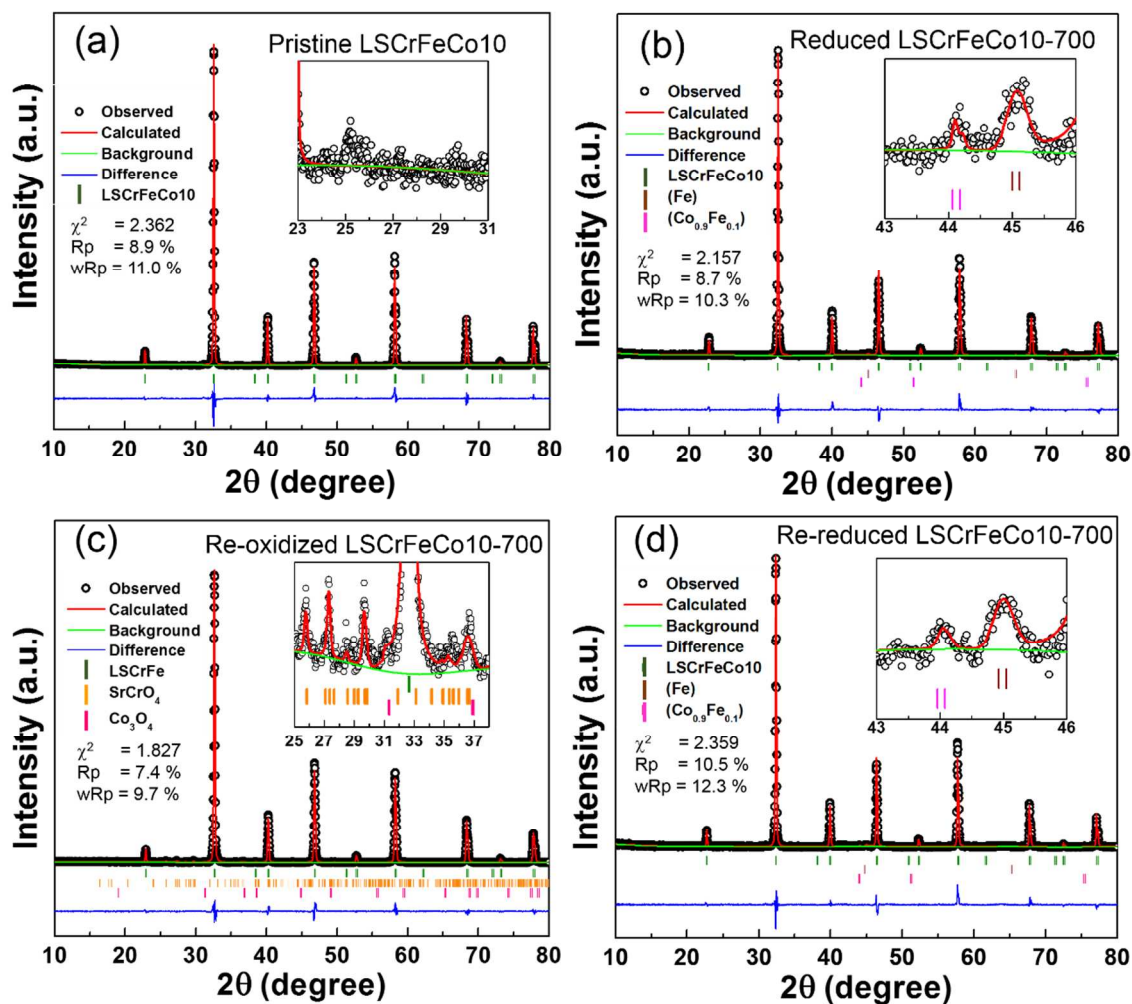

Figure S1. XRD refinement results of (a) pristine LSCrFeCo10, (b) reduced LSCrFeCo10, (c) re-oxidized LSCrFeCo10, and (d) re-reduced LSCrFeCo10 samples where the redox temperature is 700 °C. The inset shows the selective  $2\theta$  range of major peaks for the impurity phase.

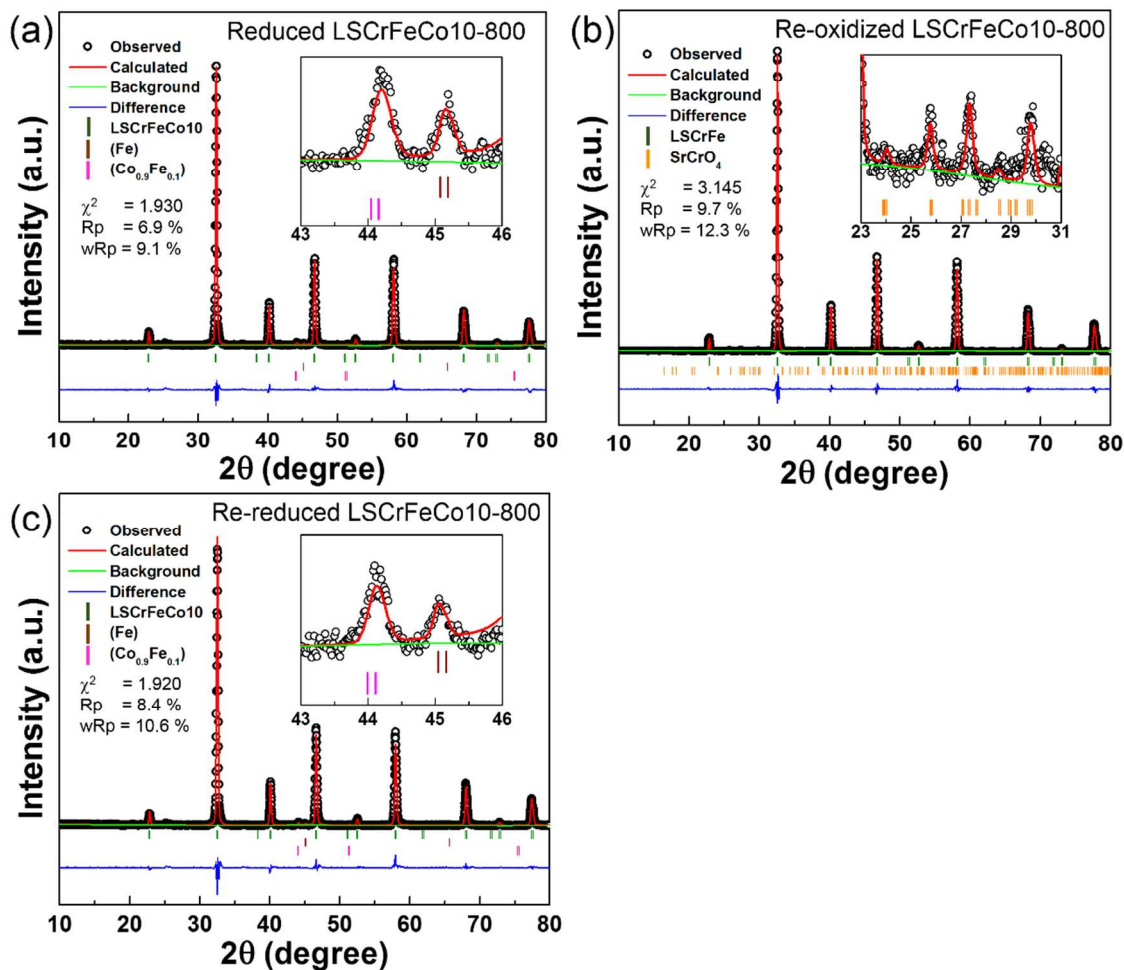

Figure S2. XRD refinement results of (a) reduced LSCrFeCo10, (b) re-oxidized LSCrFeCo10, and (c) re-reduced LSCrFeCo10 samples where the redox temperature is 800 °C. The inset shows the selective  $2\theta$  range of major peaks for the impurity phase.

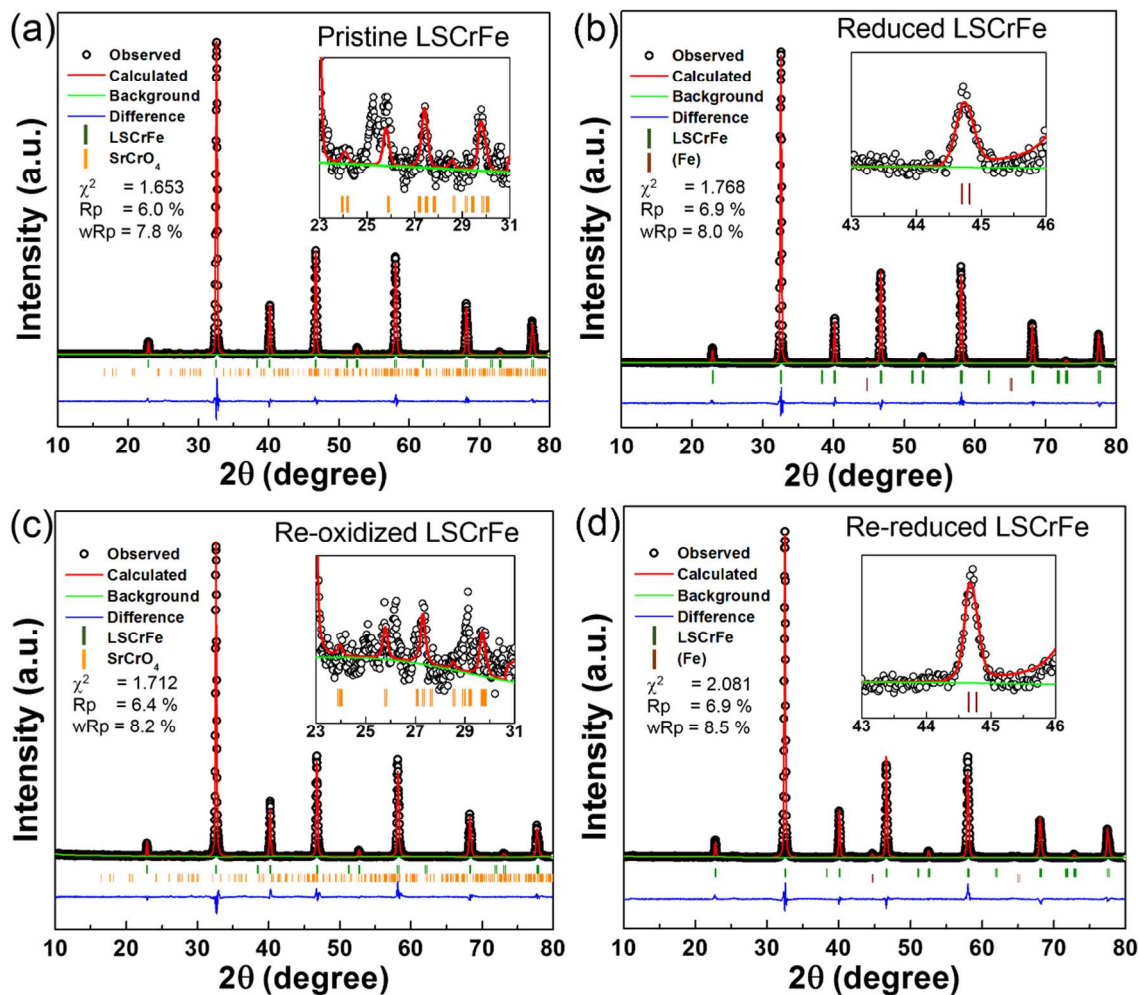

Figure S3. XRD refinement results of (a) pristine LSCrFe, (b) reduced LSCrFe, (c) re-oxidized LSCrFe, and (d) re-reduced LSCrFe samples where the redox temperature is 800 °C. The inset shows the selective  $2\theta$  range of major peaks for the impurity phase.

Table S1: Lattice parameters and fraction of LSCrFe and impurity phase during the redox process at 800 °C

| Process                                                 | Phase              | Lattice Parameters |           |            | Fraction<br>(wt.%) |
|---------------------------------------------------------|--------------------|--------------------|-----------|------------|--------------------|
|                                                         |                    | a (Å)              | b (Å)     | c (Å)      |                    |
| <b><u>LSCrFe powder annealed at 800 °C for 24 h</u></b> |                    |                    |           |            |                    |
| Pristine                                                | Perovskite         | 5.5056(5)          |           | 13.4845(2) | 98.2               |
|                                                         | SrCrO <sub>4</sub> | 7.0091(6)          | 7.3061(6) | 6.6782(5)  | 1.8                |
| Reduced                                                 | Perovskite         | 5.5043(2)          |           | 13.4832(1) | 99.4               |
|                                                         | (Fe)               | 2.8644(6)          |           |            | 0.6                |
| Re-oxidized                                             | Perovskite         | 5.4951(1)          |           | 13.4607(5) | 98.1               |
|                                                         | SrCrO <sub>4</sub> | 7.0635(1)          | 7.3657(9) | 6.7192(8)  | 1.9                |
| Re-reduced                                              | Perovskite         | 5.5041(1)          |           | 13.4821(6) | 98.9               |
|                                                         | (Fe)               | 2.8571(3)          |           |            | 1.1                |

**(a) Reduced at 800 °C**

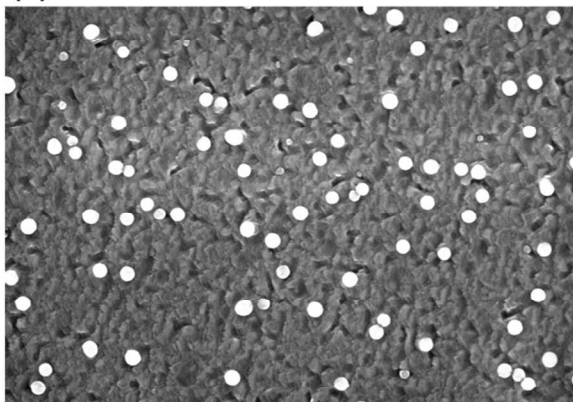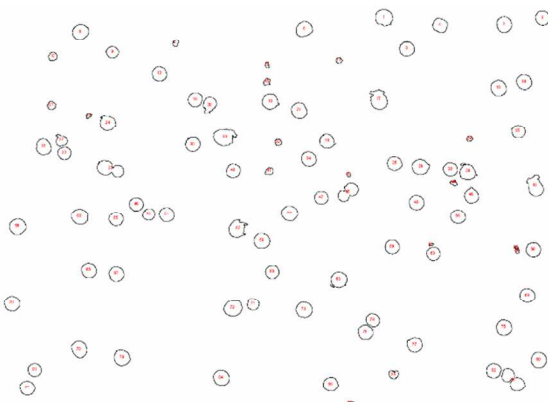

**(b) Re-reduced at 800 °C**

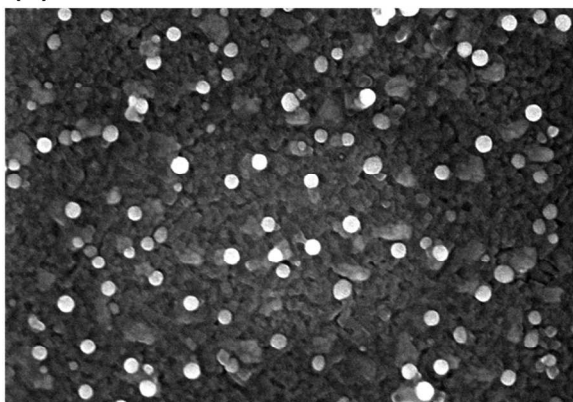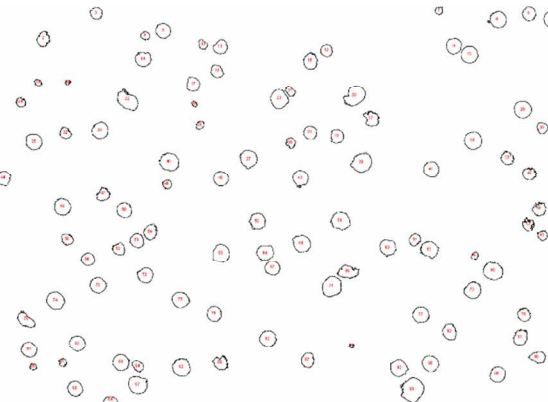

Figure S4. Particle size analysis for the LSCrFeCo10 samples which were (a) reduced and (b) re-reduced at 800 °C for 24 h. The scale bar is 1  $\mu\text{m}$ .



**(a) Reduced at 700 °C**

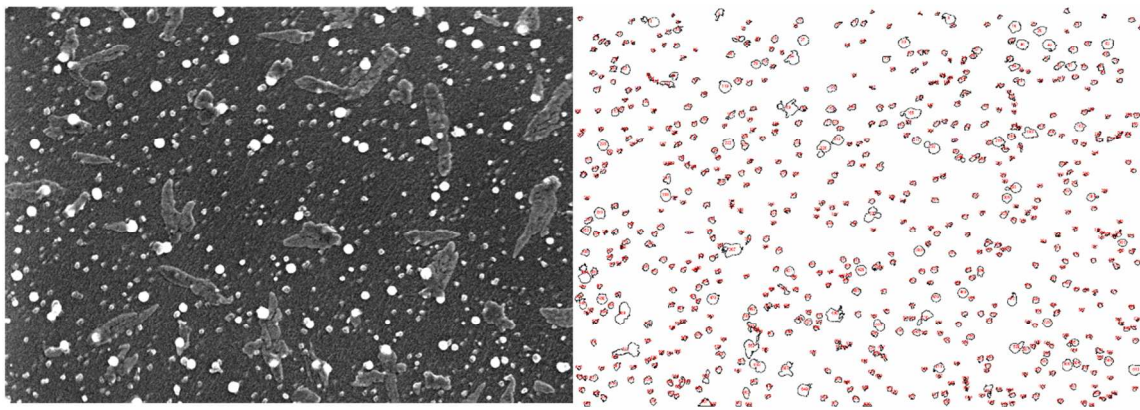

**(b) Re-reduced at 700 °C**

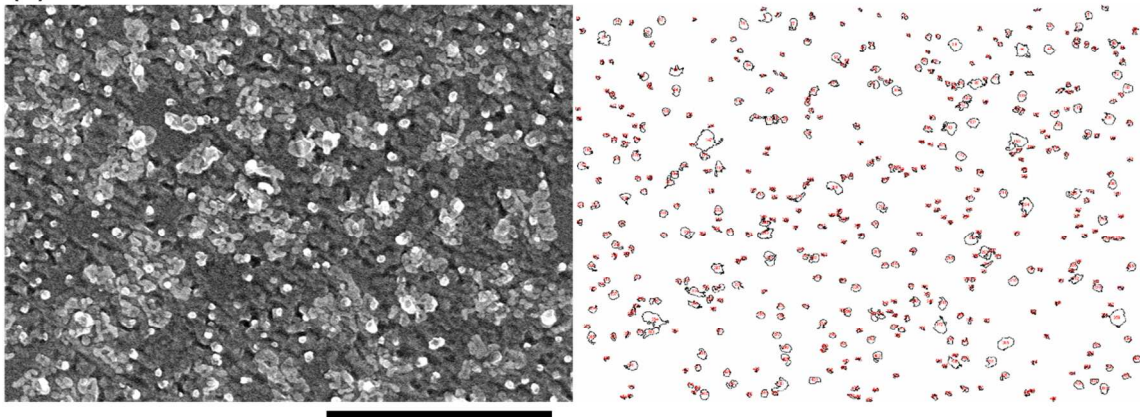

Figure S5. Particle size analysis for the LSCrFeCo10 samples which were (a) reduced and (b) re-reduced at 700 °C, respectively, for 24 h and 36 h. The scale bar is 1  $\mu\text{m}$ .
